# Supplementary material for: Fluconazole Failure in the Treatment of Coccidioidal Meningitis
Source: MDPI journal article supplement (doi:10.3390/jof8111157), 2022-11-01
Supplement: s1 [file s1]

Supplemental Table S1:

|                                                    | Failure (N=22) | No failure (N=49) | Total (N=71)   | P-value                  | Odds Ratio (CI)    |
|----------------------------------------------------|----------------|-------------------|----------------|--------------------------|--------------------|
| Previous treatment of pulmonary coccidioidomycosis | 9 (40.9%)      | 10 (20.4%)        | 19 (26.8%)     | 0.07 <sup>1</sup>        | 2.7 (0.90-8.02)    |
| Time from symptom onset to diagnosis of CM (days)  | 301.7 (641.3)  | 47.3 (52.4)       | 137.1 (395.8)  | <b>0.03</b> <sup>2</sup> | 1.01 (1.00-1.01)   |
| Age at diagnosis                                   | 49.5 (18.0)    | 57.5 (17.0)       | 55.1 (17.6)    | 0.08 <sup>2</sup>        | 0.97 (0.94-1.00)   |
| Sex: Male                                          | 14 (63.6%)     | 37 (75.5%)        | 51 (71.8%)     | 0.30 <sup>1</sup>        | 0.57 (0.19-1.72)   |
| Race                                               |                |                   |                | 0.32 <sup>3</sup>        |                    |
| White                                              | 16 (76.2%)     | 41 (83.7%)        | 57 (81.4%)     |                          |                    |
| Asian                                              | 2 (9.5%)       | 6 (12.2%)         | 8 (11.4%)      |                          |                    |
| Black Or African American                          | 2 (9.5%)       | 1 (2.0%)          | 3 (4.3%)       |                          |                    |
| Native Hawaii/Pacific Islander                     | 0 (0.0%)       | 1 (2.0%)          | 1 (1.4%)       |                          |                    |
| Other                                              | 1 (4.8%)       | 0 (0.0%)          | 1 (1.4%)       |                          |                    |
| Ethnicity                                          |                |                   |                | 0.52 <sup>3</sup>        |                    |
| Hispanic/Latino                                    | 2 (9.1%)       | 3 (6.1%)          | 5 (7.0%)       |                          |                    |
| Not Hispanic/Latino                                | 19 (86.4%)     | 45 (91.8%)        | 64 (90.1%)     |                          |                    |
| Choose Not To Disclose                             | 1 (4.5%)       | 1 (2.0%)          | 2 (2.8%)       |                          |                    |
| Immunocompromised                                  | 6 (27.3%)      | 18 (37.5%)        | 24 (34.3%)     | 0.40 <sup>1</sup>        | 0.63 (0.19-1.83)   |
| Full-time resident in endemic area                 | 20 (90.9%)     | 43 (87.8%)        | 63 (88.7%)     | 1.00 <sup>3</sup>        |                    |
| Cranial nerve findings                             | 2 (9.1%)       | 6 (12.2%)         | 8 (11.3%)      | 1.00 <sup>3</sup>        |                    |
| Headache                                           | 20 (90.9%)     | 38 (77.6%)        | 58 (81.7%)     | 0.18 <sup>1</sup>        | 2.89 (0.69-19.90)  |
| Gait instability                                   | 7 (31.8%)      | 20 (40.8%)        | 27 (38.0%)     | 0.47 <sup>1</sup>        | 0.68 (0.22-1.92)   |
| Encephalopathy                                     | 1 (4.5%)       | 14 (28.6%)        | 15 (21.1%)     | <b>0.03</b> <sup>3</sup> |                    |
| Fatigue                                            | 11 (50.0%)     | 17 (34.7%)        | 28 (39.4%)     | 0.22 <sup>1</sup>        | 1.88 (0.68-5.30)   |
| Fever/night sweats                                 | 11 (50.0%)     | 24 (49.0%)        | 35 (49.3%)     | 0.94 <sup>1</sup>        | 1.04 (0.38-2.87)   |
| Cough                                              | 8 (36.4%)      | 12 (24.5%)        | 20 (28.2%)     | 0.30 <sup>1</sup>        | 1.76 (0.58-5.22)   |
| Weight loss                                        | 4 (18.2%)      | 8 (16.3%)         | 12 (16.9%)     | 0.85 <sup>1</sup>        | 1.14 (0.28-4.12)   |
| Rash                                               | 4 (18.2%)      | 4 (8.2%)          | 8 (11.3%)      | 0.22 <sup>1</sup>        | 2.50 (0.54-11.64)  |
| Arthralgias                                        | 4 (18.2%)      | 5 (10.2%)         | 9 (12.7%)      | 0.35 <sup>1</sup>        | 1.96 (0.44-8.23)   |
| Serum WBC                                          | 8.5 (4.2)      | 8.2 (2.9)         | 8.3 (3.2)      | 0.78 <sup>2</sup>        | 1.03 (0.83-1.28)   |
| Serum eosinophils                                  | 0.7 (1.2)      | 1.9 (3.7)         | 1.6 (3.3)      | 0.32 <sup>2</sup>        | 0.81 (0.39-1.10)   |
| Serum IgM (immunodiffusion)                        | 11 (50.0%)     | 16 (44.4%)        | 27 (46.6%)     | 0.68 <sup>1</sup>        | 1.25 (0.43 – 3.66) |
| Serum IgG (immunodiffusion)                        | 19 (86.4%)     | 30 (83.3%)        | 49 (84.5%)     | 0.76 <sup>1</sup>        | 1.27 (0.30-6.57)   |
| Serum IgM (EIA)                                    | 5 (26.3%)      | 16 (47.1%)        | 21 (39.6%)     | 0.14 <sup>1</sup>        | 0.40 (0.11-1.31)   |
| Serum IgG (EIA)                                    | 14 (73.7%)     | 26 (76.5%)        | 40 (75.5%)     | 0.82 <sup>1</sup>        | 0.86 (0.24-3.31)   |
| Serum Comp/Fix                                     |                |                   |                | 0.35 <sup>3</sup>        |                    |
| 1:2                                                | 3 (13.6%)      | 4 (11.4%)         | 7 (12.3%)      |                          |                    |
| 1:4                                                | 6 (27.3%)      | 2 (5.7%)          | 8 (14.0%)      |                          |                    |
| 1:8                                                | 0 (0.0%)       | 4 (11.4%)         | 4 (7.0%)       |                          |                    |
| 1:16                                               | 6 (27.3%)      | 5 (14.3%)         | 11 (19.3%)     |                          |                    |
| 1:32                                               | 2 (9.1%)       | 3 (8.6%)          | 5 (8.8%)       |                          |                    |
| 1:64                                               | 1 (4.5%)       | 3 (8.6%)          | 4 (7.0%)       |                          |                    |
| 1:128                                              | 2 (9.1%)       | 4 (11.4%)         | 6 (10.5%)      |                          |                    |
| 1:256                                              | 1 (4.5%)       | 2 (5.7%)          | 3 (5.3%)       |                          |                    |
| 1:512                                              | 0 (0.0%)       | 2 (5.7%)          | 2 (3.5%)       |                          |                    |
| 1:2048                                             | 0 (0.0%)       | 1 (2.9%)          | 1 (1.8%)       |                          |                    |
| Negative                                           | 1 (4.5%)       | 5 (14.3%)         | 6 (10.5%)      |                          |                    |
| CSF RBC                                            | 762.2 (2738.2) | 792.9 (2685.2)    | 784.0 (2675.2) | 0.97 <sup>2</sup>        | 1.00 (1.00-1.00)   |
| CSF WBC                                            | 330.7 (433.2)  | 261.0 (392.4)     | 283.8 (403.9)  | 0.53 <sup>2</sup>        | 1.00 (1.00-1.00)   |
| CSF lymphocytes                                    | 52.8 (27.0)    | 63.5 (27.3)       | 59.8 (27.4)    | 0.17 <sup>2</sup>        | 0.99 (0.96-1.01)   |
| CSF monocytes                                      | 16.7 (16.0)    | 19.2 (22.6)       | 18.3 (20.3)    | 0.68 <sup>2</sup>        | 0.99 (0.96-1.02)   |
| CSF neutrophils                                    | 36.7 (29.2)    | 22.9 (25.8)       | 27.8 (27.6)    | 0.11 <sup>2</sup>        | 1.02 (1.00-1.04)   |
| CSF protein                                        | 297.1 (562.3)  | 146.6 (133.8)     | 196.0 (342.2)  | 0.11 <sup>2</sup>        | 1.00 (1.00-1.01)   |
| CSF glucose                                        | 45.3 (24.8)    | 48.9 (27.6)       | 47.8 (26.6)    | 0.63 <sup>2</sup>        | 0.99 (0.97-1.02)   |
| CSF IgM (immunodiffusion)                          | 2 (10.5%)      | 1 (3.0%)          | 3 (5.8%)       | 0.55 <sup>3</sup>        |                    |
| CSF IgG (immunodiffusion)                          | 9 (47.4%)      | 20 (60.6%)        | 29 (55.8%)     | 0.36 <sup>1</sup>        | 0.59 (0.18 – 1.83) |

|                                     |            |            |            |                   |                   |
|-------------------------------------|------------|------------|------------|-------------------|-------------------|
| CSF IgM (EIA)                       | 5 (38.5%)  | 7 (28.0%)  | 12 (31.6%) | 0.51 <sup>1</sup> | 1.61 (0.38-6.71)  |
| CSF IgG (EIA)                       | 11 (84.6%) | 19 (76.0%) | 30 (78.9%) | 0.54 <sup>1</sup> | 1.74 (0.33-13.27) |
| CSF Comp/Fix                        |            |            |            | 0.60 <sup>3</sup> |                   |
| 1:2                                 | 3 (18.8%)  | 6 (20.7%)  | 9 (20.0%)  |                   |                   |
| 1:4                                 | 3 (18.8%)  | 7 (24.1%)  | 10 (22.2%) |                   |                   |
| 1:8                                 | 2 (12.5%)  | 3 (10.3%)  | 5 (11.1%)  |                   |                   |
| 1:16                                | 2 (12.5%)  | 8 (27.6%)  | 10 (22.2%) |                   |                   |
| 1:32                                | 2 (12.5%)  | 1 (3.4%)   | 3 (6.7%)   |                   |                   |
| 1:128                               | 1 (6.2%)   | 0 (0.0%)   | 1 (2.2%)   |                   |                   |
| 1:256                               | 2 (12.5%)  | 1 (3.4%)   | 3 (6.7%)   |                   |                   |
| Negative                            | 1 (6.2%)   | 3 (10.3%)  | 4 (8.9%)   |                   |                   |
| Any positive CSF serology           | 12 (92.3%) | 21 (87.5%) | 33 (89.2%) | 1.00 <sup>3</sup> |                   |
| Abnormal brain imaging              | 16 (84.2%) | 25 (67.6%) | 41 (73.2%) | 0.18 <sup>1</sup> | 2.56 (0.58-12.52) |
| Imaging-Enhancement                 | 14 (63.6%) | 21 (42.9%) | 35 (49.3%) | 0.11 <sup>1</sup> | 2.33 (0.84-6.82)  |
| Imaging-Stroke                      | 4 (18.2%)  | 8 (16.3%)  | 12 (16.9%) | 0.85 <sup>1</sup> | 1.14 (0.28-4.12)  |
| Imaging-Hydrocephalus               | 6 (27.3%)  | 9 (18.4%)  | 15 (21.1%) | 0.40 <sup>1</sup> | 1.67 (0.49-5.42)  |
| Starting dose of Fluconazole (mg/d) |            |            |            | 0.72 <sup>3</sup> |                   |
| 200                                 | 0 (0.0%)   | 2 (4.1%)   | 2 (2.9%)   |                   |                   |
| 400                                 | 7 (33.3%)  | 10 (20.4%) | 17 (24.3%) |                   |                   |
| 600                                 | 1 (4.8%)   | 5 (10.2%)  | 6 (8.6%)   |                   |                   |
| 800                                 | 13 (61.9%) | 31 (63.3%) | 44 (62.9%) |                   |                   |
| 1000                                | 0 (0.0%)   | 1 (2.0%)   | 1 (1.4%)   |                   |                   |

**Predictors of failure on Fluconazole.** This supplemental table depicts all variables evaluated for effect on fluconazole failure with associated p-value and odds ratios. Data was analyzed using <sup>1</sup> Pearson's Chi-squared test, <sup>2</sup> Linear Model Analysis of Variance, <sup>3</sup> Fisher's Exact Test for Count Data. (abbreviations used: CSF = cerebrospinal fluid; EIA = enzyme immunoassay; IgM = Immunoglobulin M; IgG = Immunoglobulin G; Comp/Fix = Complement fixation; mg/d milligrams per day).

Supplemental Table S2:

| Initial fluconazole Dosage | Fluconazole failure (yes/no) | Time from symptom onset to diagnosis(days) | Encephalopathy (yes/no) |
|----------------------------|------------------------------|--------------------------------------------|-------------------------|
| 200                        | no                           |                                            | no                      |
| 200                        | no                           |                                            | no                      |
| 400                        | yes                          | 14                                         | no                      |
| 400                        | no                           |                                            | no                      |
| 400                        | no                           | 14                                         | no                      |
| 400                        | yes                          | 6                                          | yes                     |
| 400                        | no                           | 10                                         | yes                     |
| 400                        | yes                          |                                            | no                      |
| 400                        | yes                          |                                            | no                      |
| 400                        | no                           |                                            | yes                     |
| 400                        | yes                          | 14                                         | no                      |
| 400                        | no                           |                                            | no                      |
| 400                        | yes                          | 2232                                       | no                      |
| 400                        | no                           |                                            | no                      |
| 400                        | no                           | 30                                         | no                      |

|     |     |     |     |
|-----|-----|-----|-----|
| 400 | yes | 60  | no  |
| 600 | no  |     | no  |
| 600 | no  |     | yes |
| 600 | no  | 65  | no  |
| 600 | no  |     | no  |
| 600 | no  | 4   | no  |
| 600 | yes | 540 | no  |
| 800 | yes | 16  | no  |
| 800 | no  | 9   | yes |
| 800 | no  | 213 | no  |
| 800 | no  | 45  | yes |
| 800 | no  | 31  | no  |
| 800 | yes |     | no  |
| 800 | no  | 60  | no  |
| 800 | no  | 17  | yes |
| 800 | no  | 20  | yes |
| 800 | no  | 45  | no  |
| 800 | no  | 120 | yes |
| 800 | no  | 10  | no  |
| 800 | no  | 25  | yes |
| 800 | yes | 20  | no  |
| 800 | no  | 31  | no  |
| 800 | no  | 15  | no  |
| 800 | yes | 25  | no  |
| 800 | yes | 120 | no  |
| 800 | yes | 180 | no  |
| 800 | yes |     | no  |
| 800 | no  | 7   | no  |
| 800 | yes | 14  | no  |
| 800 | no  | 5   | yes |
| 800 | no  | 210 | yes |
| 800 | no  | 20  | no  |
| 800 | yes | 60  | no  |
| 800 | yes | 240 | no  |
| 800 | no  | 90  | no  |
| 800 | no  | 80  | no  |
| 800 | no  | 7   | yes |
| 800 | no  | 50  | no  |
| 800 | no  |     | no  |
| 800 | no  | 15  | no  |
| 800 | no  |     | no  |
| 800 | no  | 120 | no  |
| 800 | no  | 14  | no  |

|                        |     |      |     |
|------------------------|-----|------|-----|
| 800                    | no  | 45   | yes |
| 800                    | yes | 45   | no  |
| 800                    | no  | 60   | no  |
| initial dosage unknown | yes | 30   | no  |
| 800                    | yes | 1800 | no  |
| 800                    | no  | 25   | yes |
| 800                    | no  |      | no  |
| 800                    | no  |      | no  |
| 800                    | yes | 15   | no  |
| 1000                   | no  | 50   | no  |

**Risk factors for fluconazole failure in relation to initial dosage of fluconazole.** Supplemental table S2 shows the distribution of the significant risk factors for failure of fluconazole (delay in time to initiation of therapy from onset of symptoms, and absence of encephalopathy on presentation) in the different dosage groups. Empty rows indicate missing data. One patient was initiated on fluconazole but the starting dosage was unknown.
